# Supplementary material for: The cellular prion protein interacts with and promotes the activity of Na,K-ATPases
Source: PubMed Central journal article supplement (PMC8631662; doi:10.1371/journal.pone.0258682), 2021-11-30

## S2 Figure

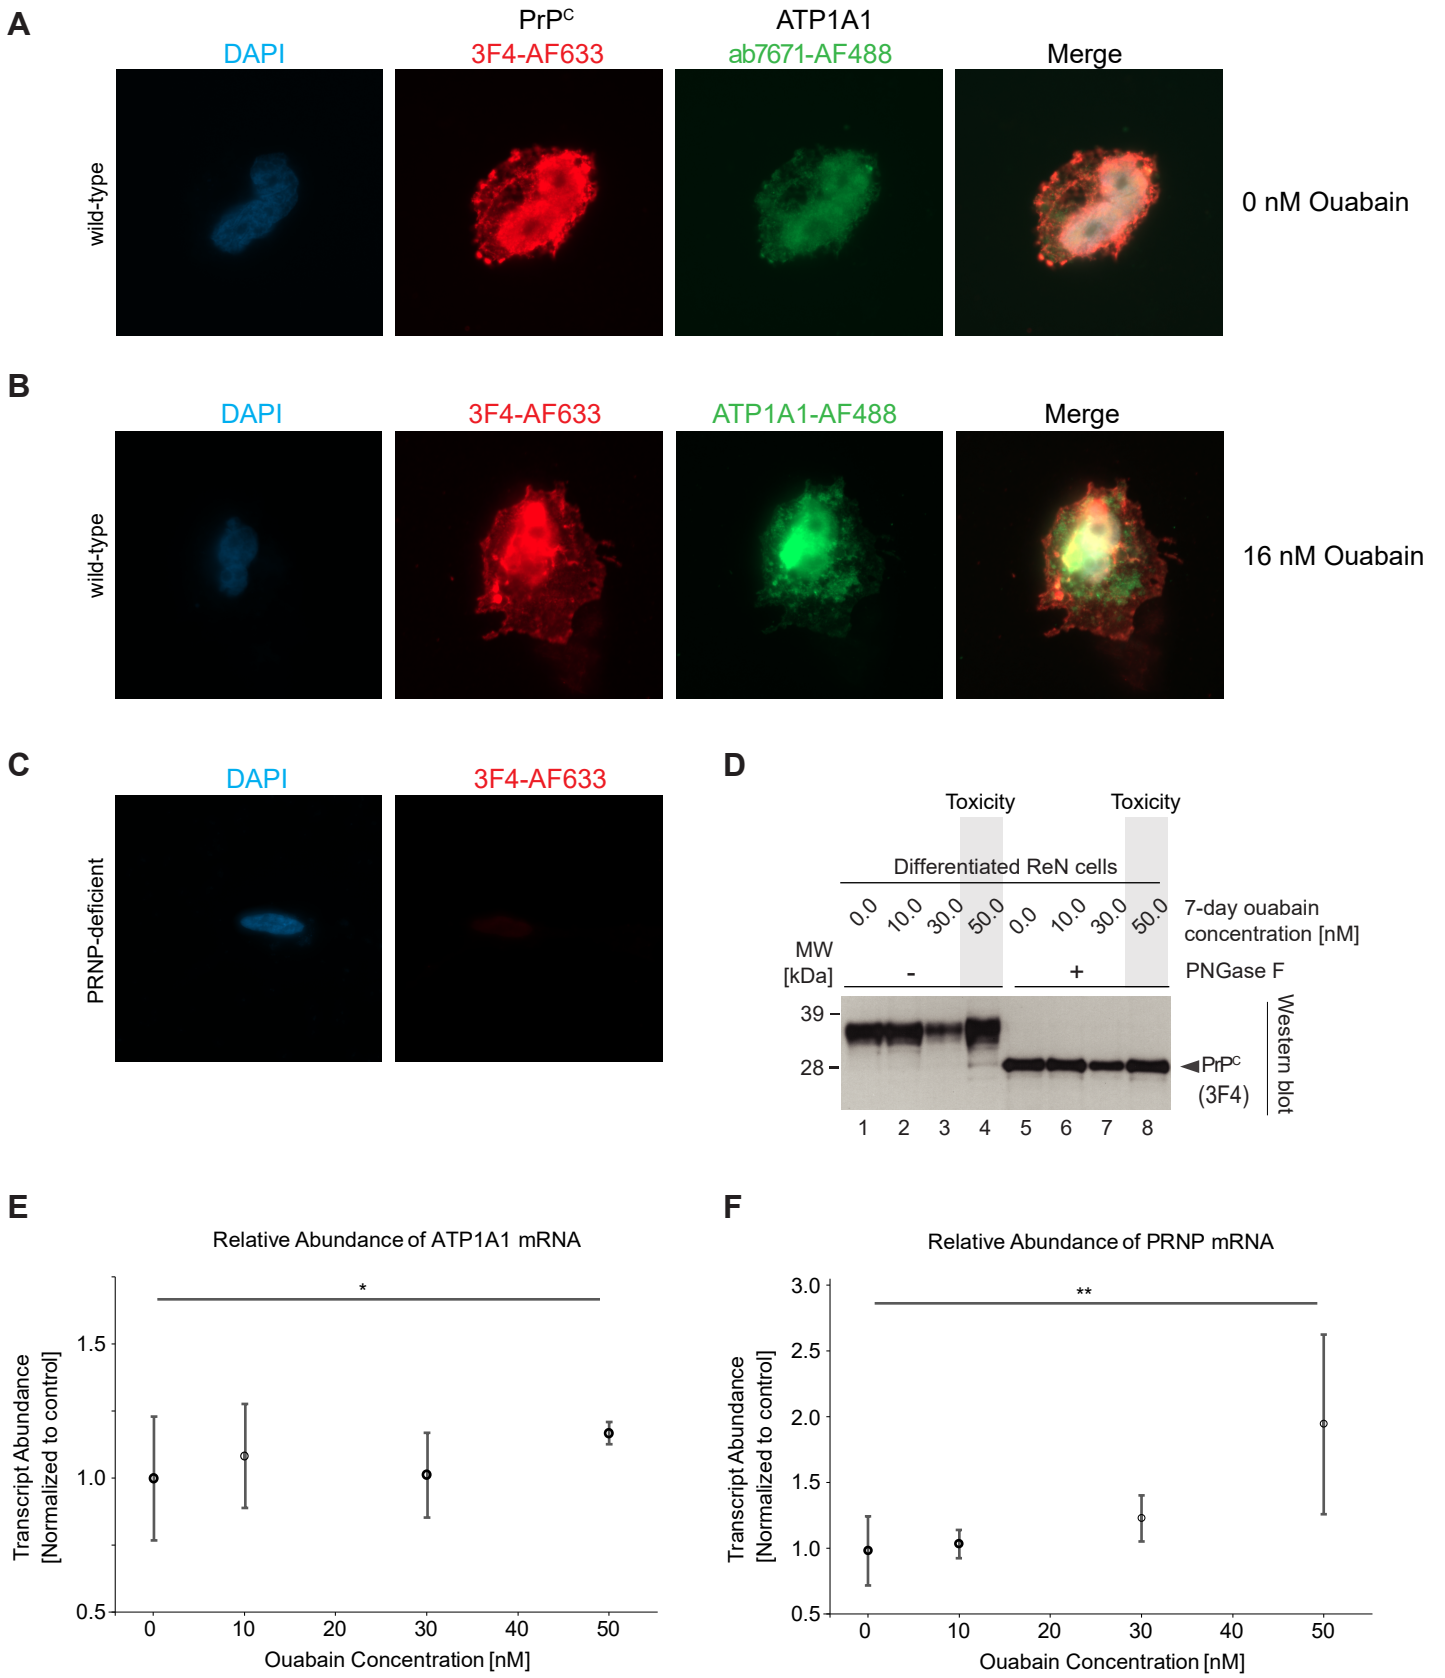

Supplement: pone.0258682.s002.pdf [file pone.0258682.s002.pdf]
