# Supplementary material for: The cellular prion protein interacts with and promotes the activity of Na,K-ATPases
Source: PubMed Central journal article supplement (PMC8631662; doi:10.1371/journal.pone.0258682), 2021-11-30

**S1\_raw\_images****Figure 4**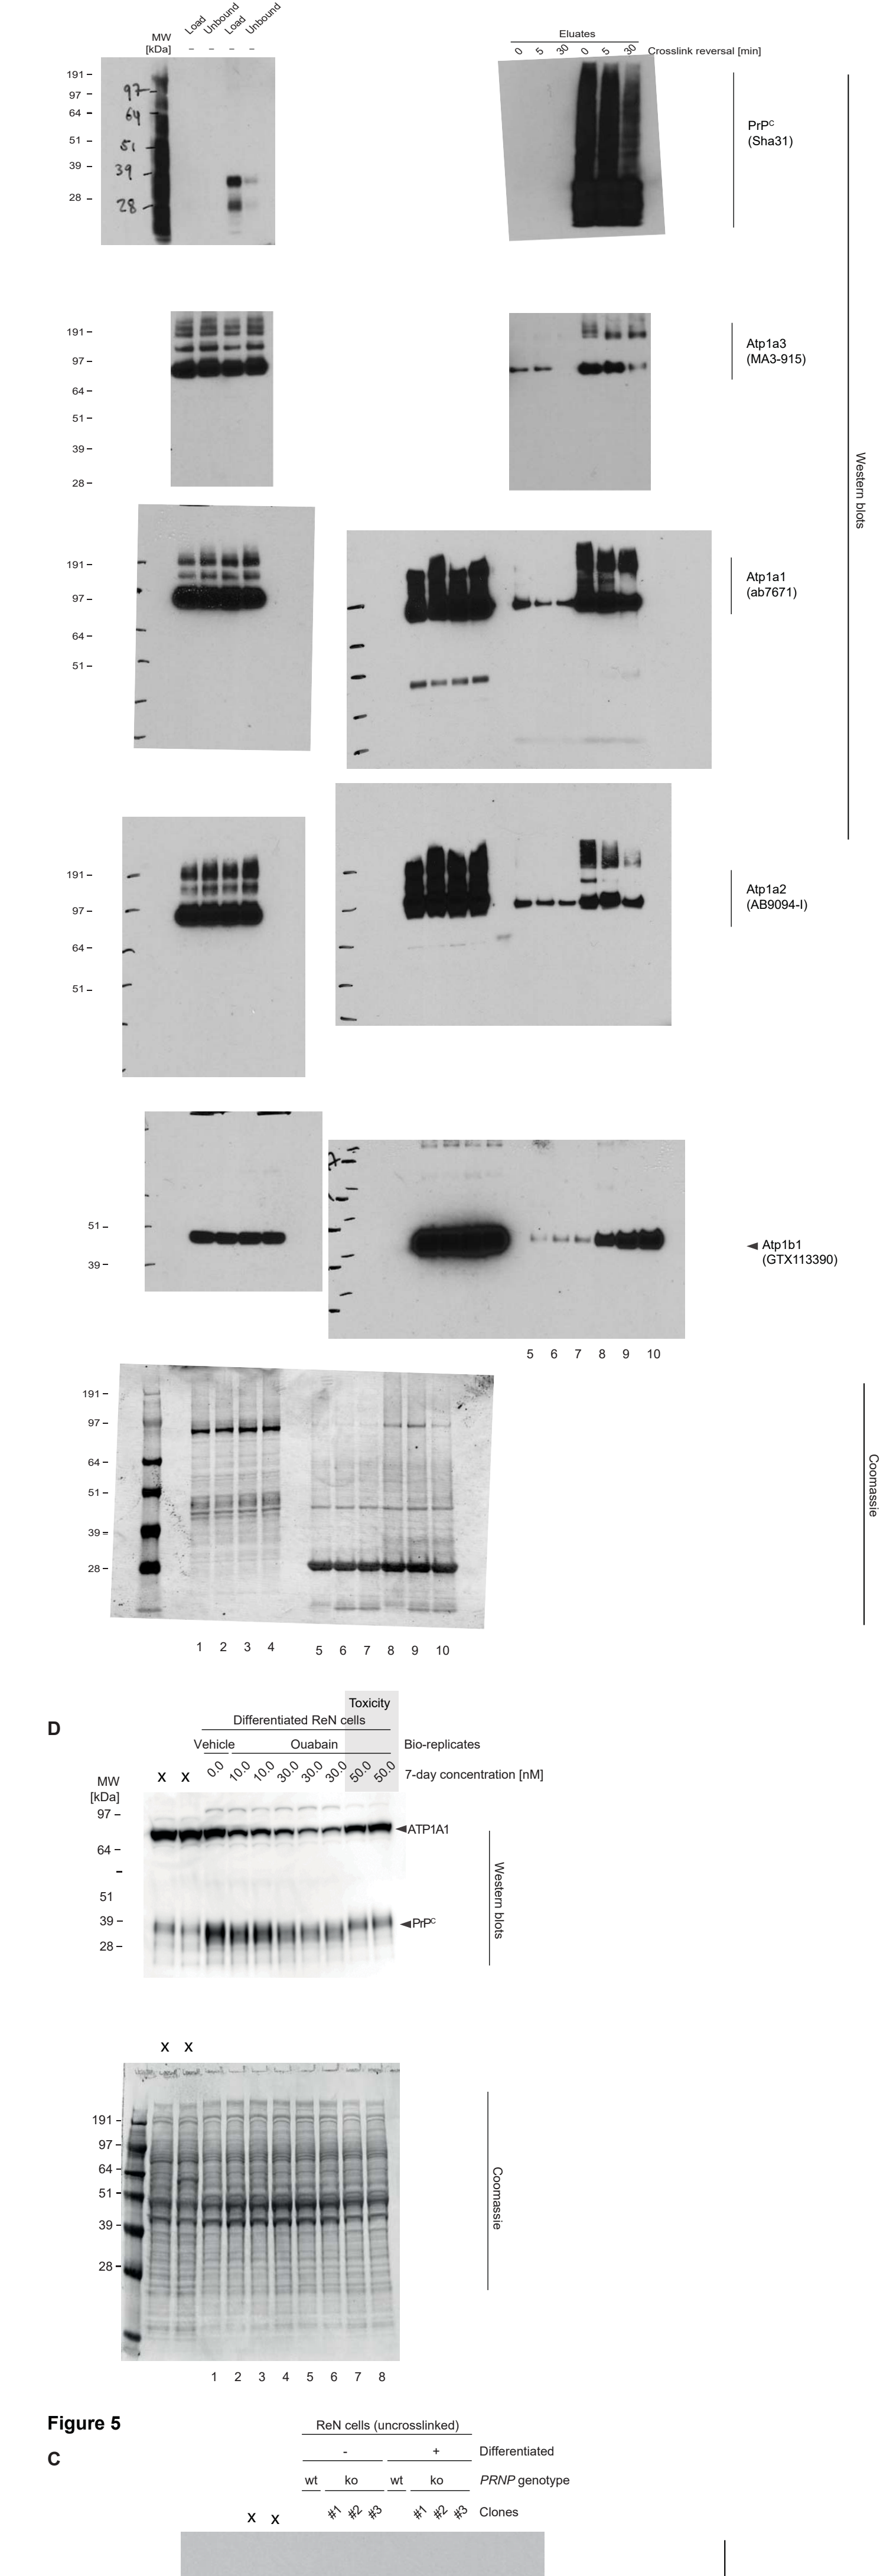**Figure 5**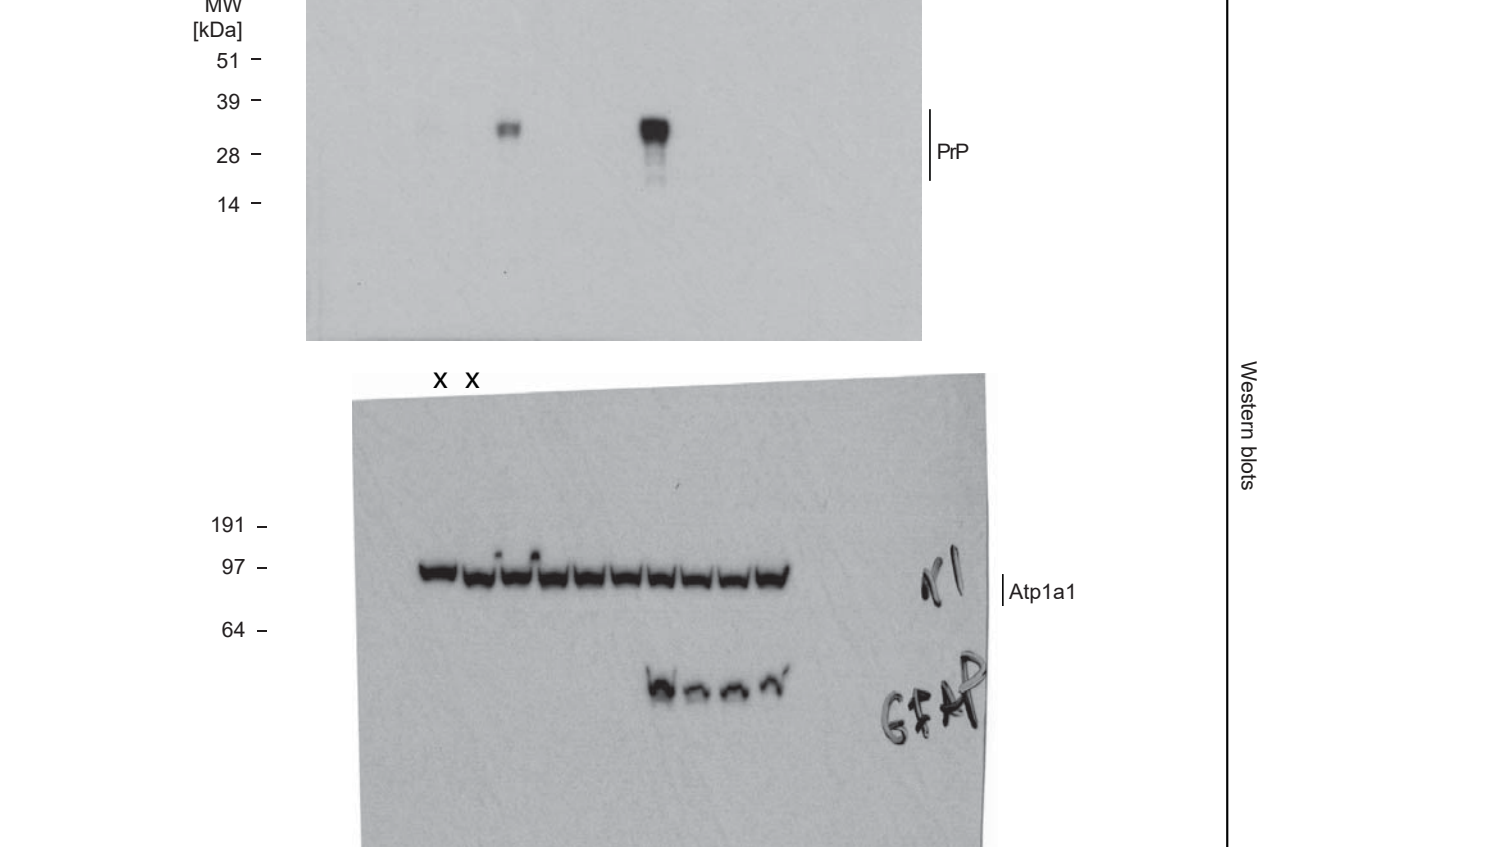**Figure 6**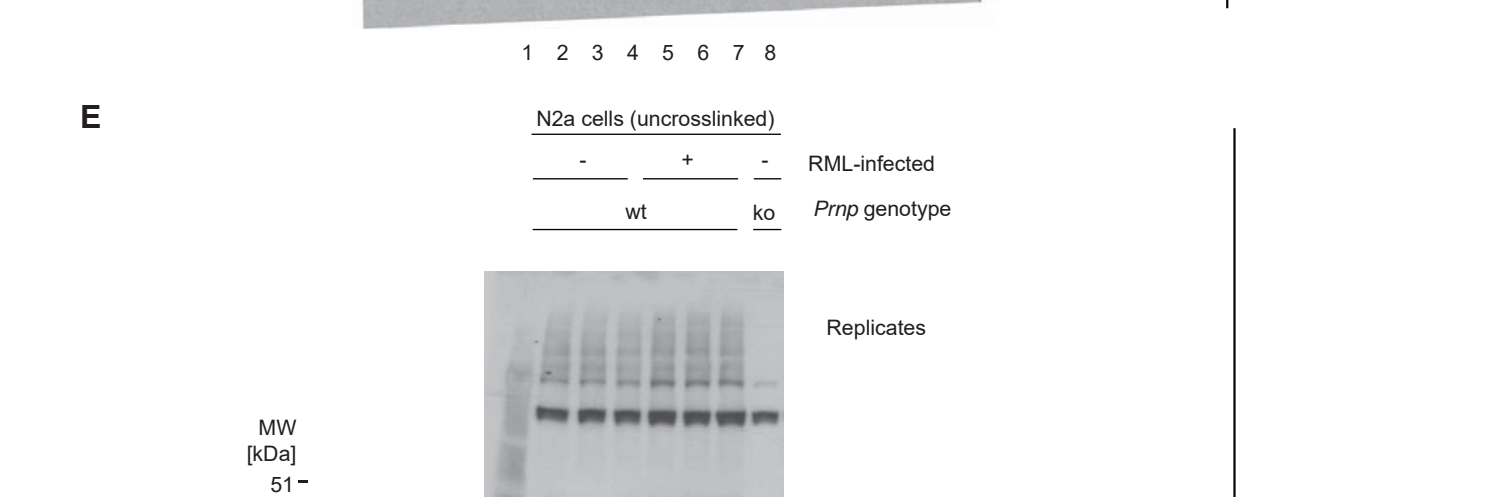**Figure 6**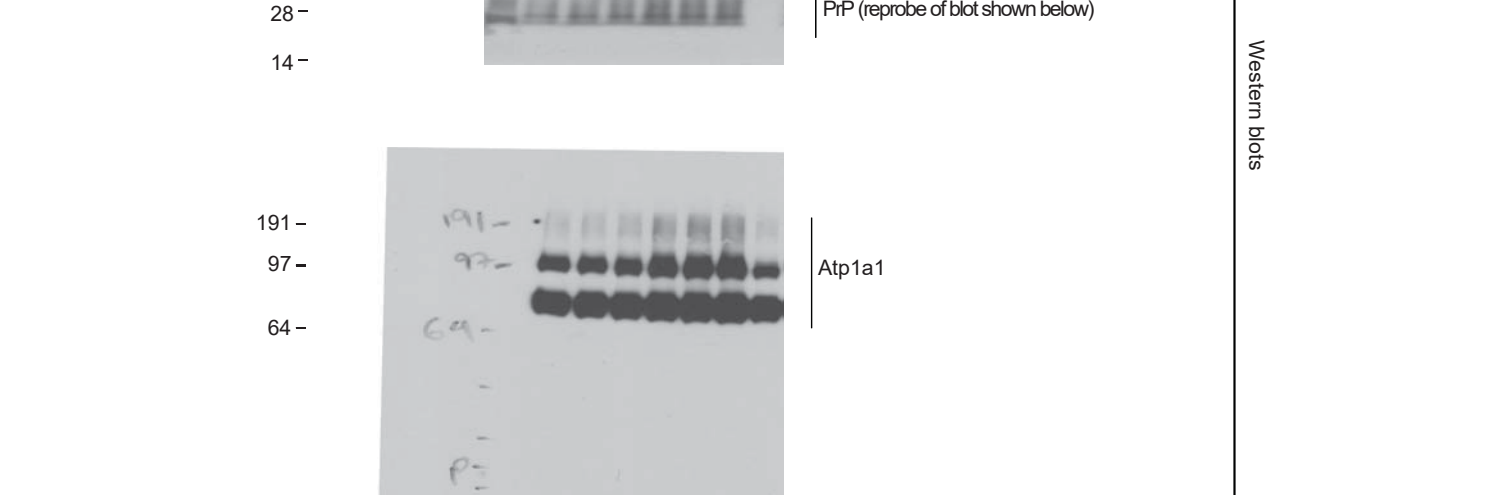**Figure 6**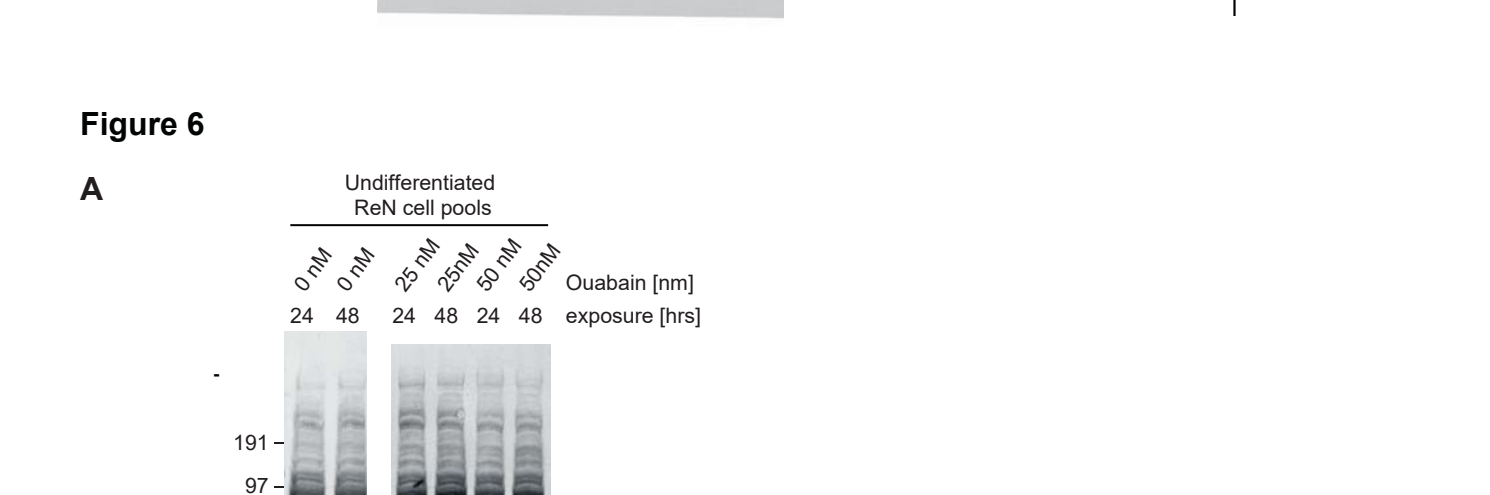**Figure 6**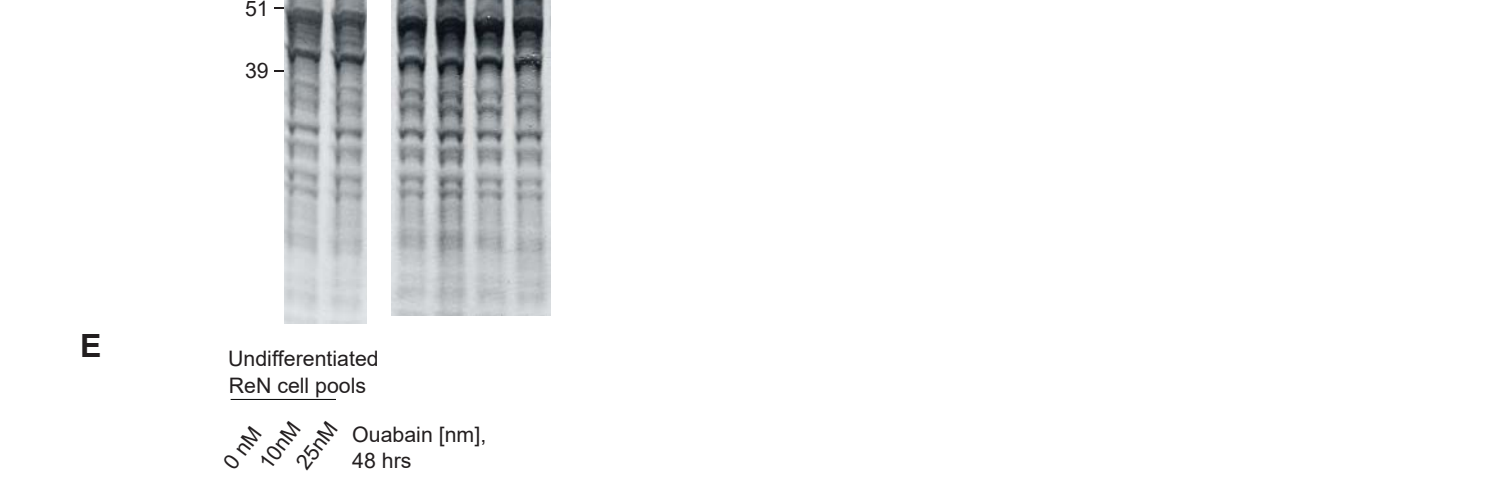**Figure 7**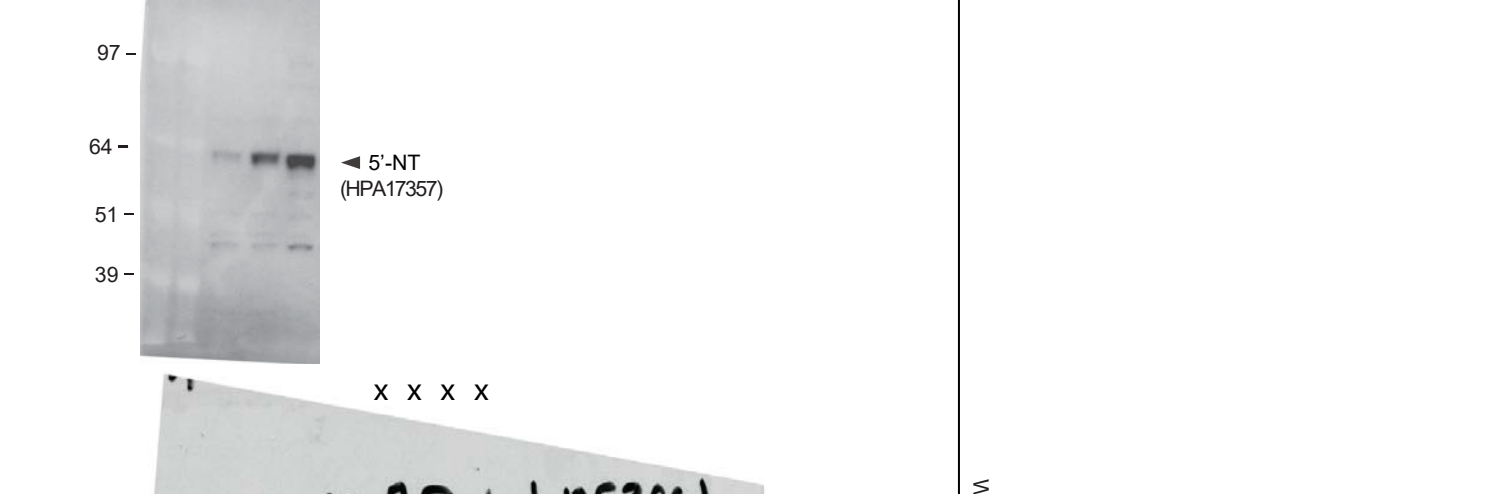**Figure 7**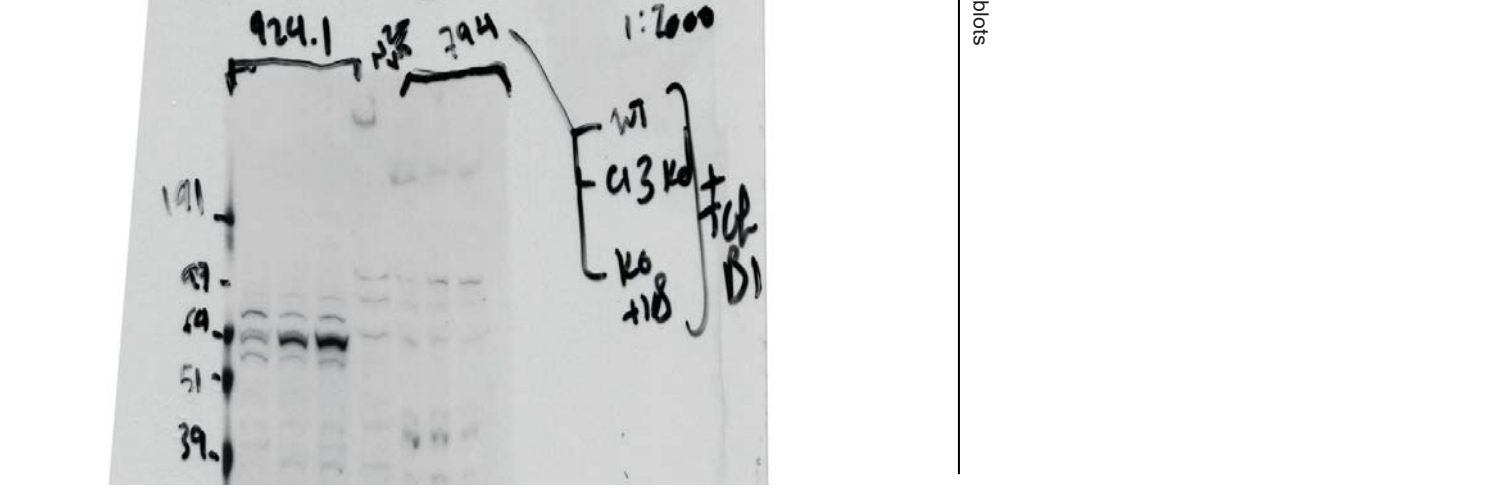**Figure 7**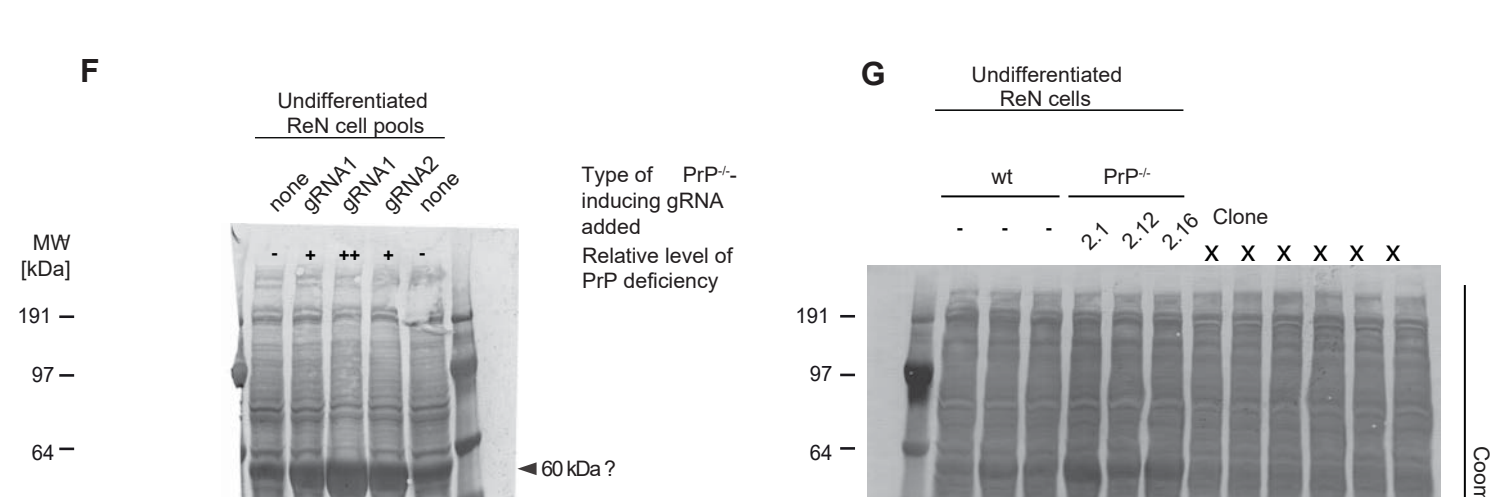**Figure 7**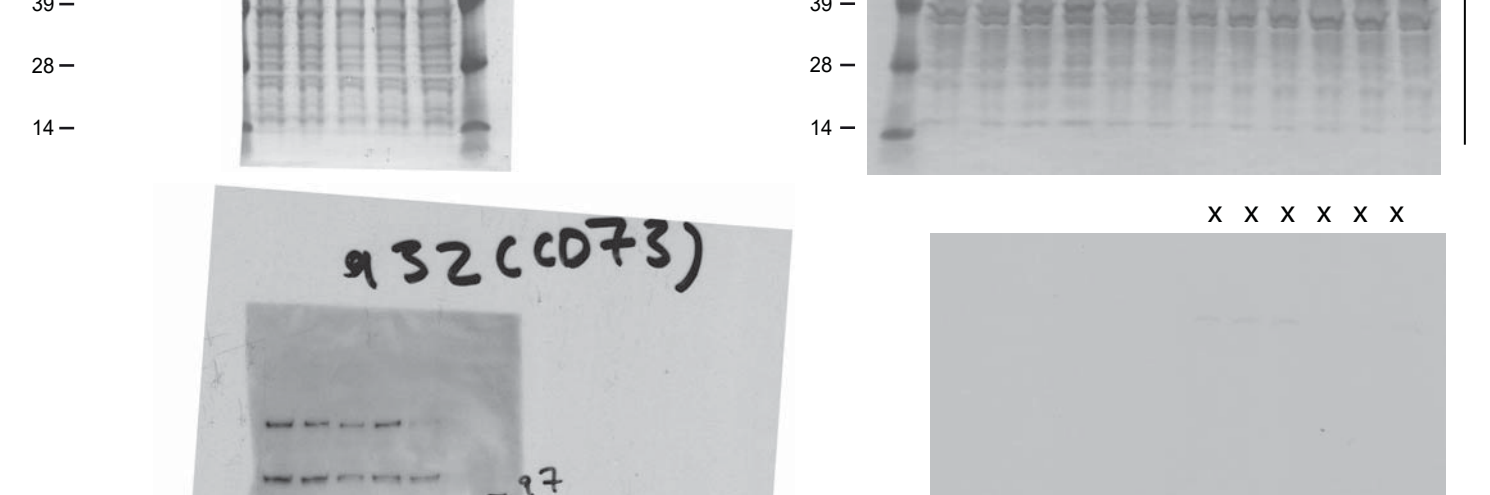**Figure 8**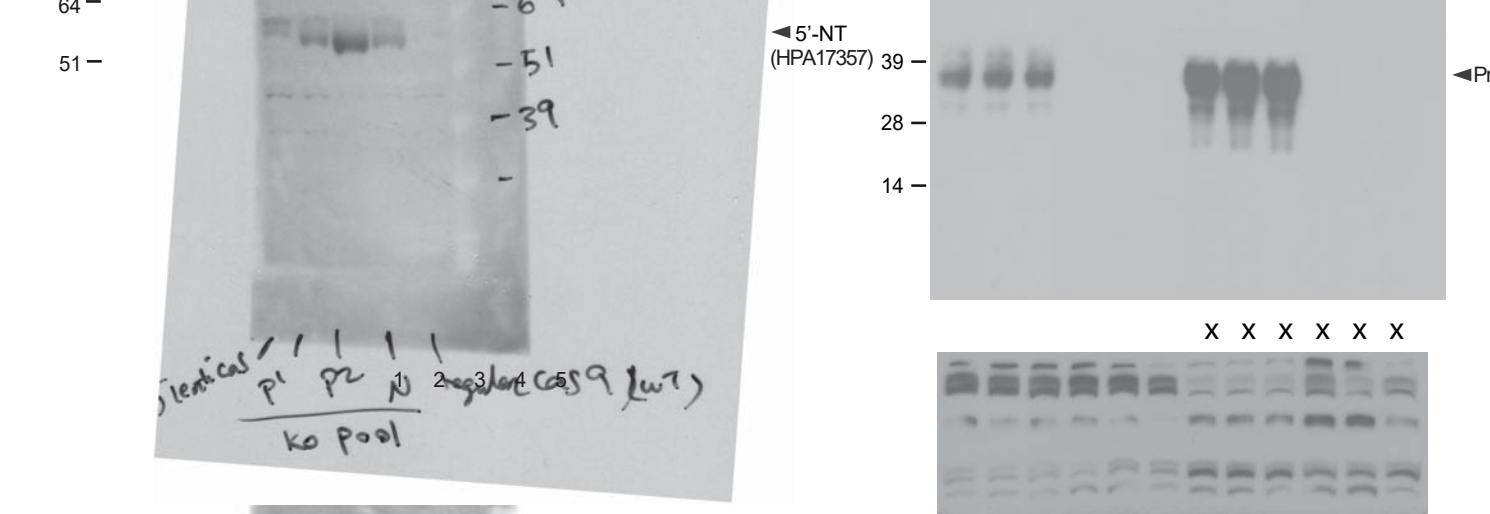

Supplement: pone.0258682.s004.pdf [file pone.0258682.s004.pdf]
